# Supplementary material for: Ni-Directed biphase N-doped Mo2C as an efficient hydrogen evolution catalyst in both acidic and alkaline conditions
Source: Royal Society of Chemistry journal article supplement (doi:10.1039/d2dt00449f), 2022-01-01
Supplement: d2dt00449f1.pdf [file d2dt00449f1.pdf]

## Supporting Information

### **Ni-directed biphasic N-doped Mo<sub>2</sub>C as efficient hydrogen evolution catalysts in both acidic and alkaline conditions**

*Cheng-Feng Du, Yaxin Wang, Xiangyuan Zhao, Jinjin Wang, Xiaomei Wang, Weigang Wang, and Hong Yu\**

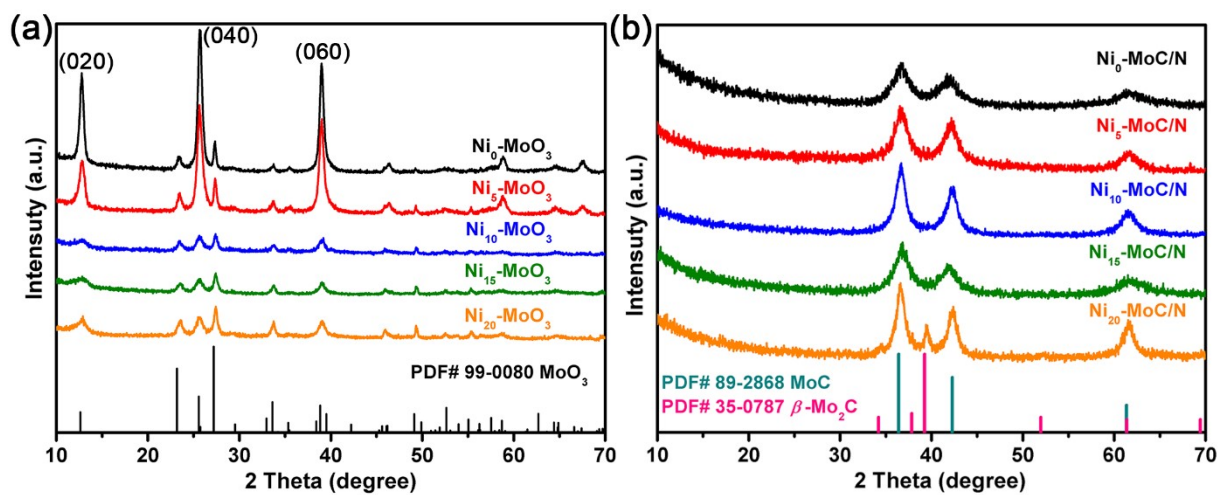

**Figure S1.** XRD patterns of (a)  $\text{Ni}_x\text{-MoO}_3$  nanobelts, and (b)  $\text{Ni}_x\text{-MoC/N}$  intermedia.

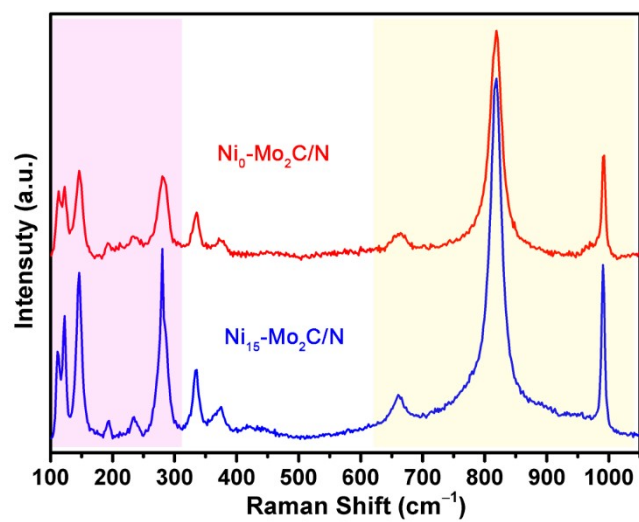

**Figure S2.** Raman spectrum of Ni<sub>0</sub>-Mo<sub>2</sub>C/N and Ni<sub>15</sub>-Mo<sub>2</sub>C/N.

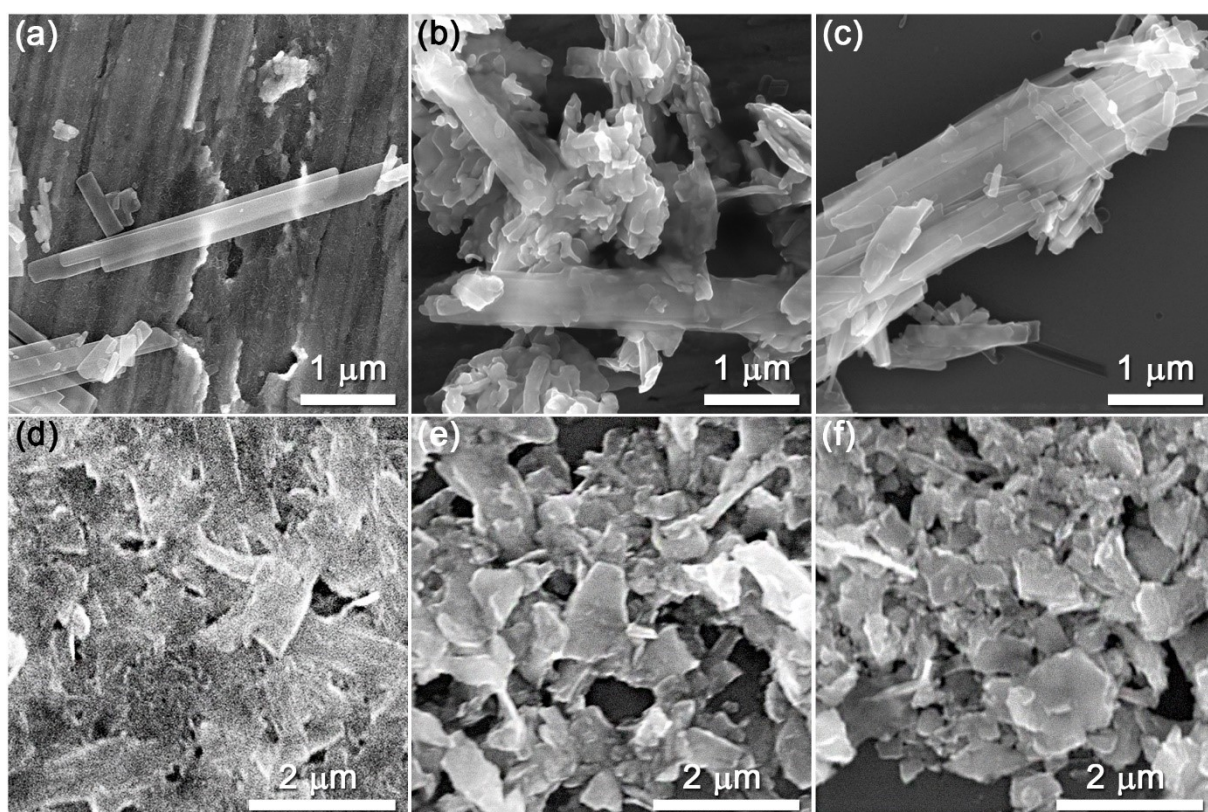

**Figure S3.** SEM images of (a)  $\text{Ni}_0\text{-MoO}_3$ , (b)  $\text{Ni}_0\text{-MoC/N}$ , (c)  $\text{Ni}_0\text{-Mo}_2\text{C/N}$ , (d)  $\text{Ni}_{15}\text{-MoO}_3$ ; (e)  $\text{Ni}_{15}\text{-MoC/N}$ , and (f)  $\text{Ni}_{15}\text{-Mo}_2\text{C/N}$ .

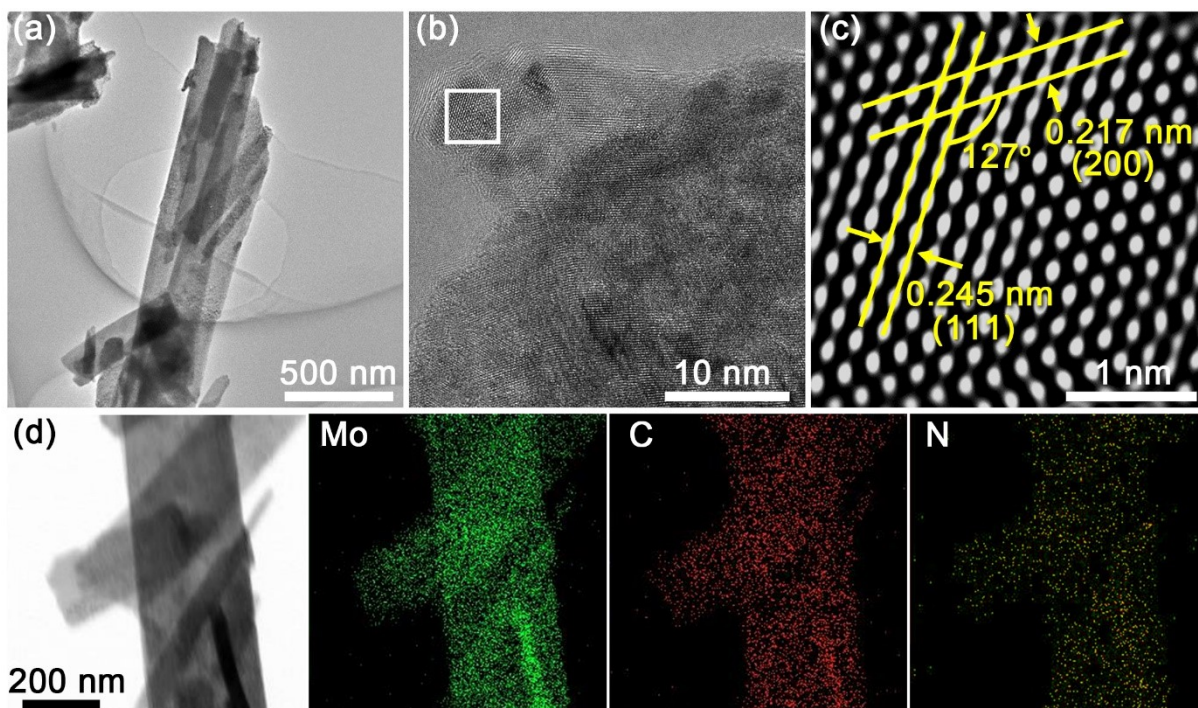

**Figure S4.** (a) TEM and (b) HRTEM image of Ni<sub>0</sub>-Mo<sub>2</sub>C/N. (c) The inverse FFT image of the region which labeled in (b). (d) Elemental mappings (Mo, C and N elements) of the Ni<sub>0</sub>-Mo<sub>2</sub>C/N.

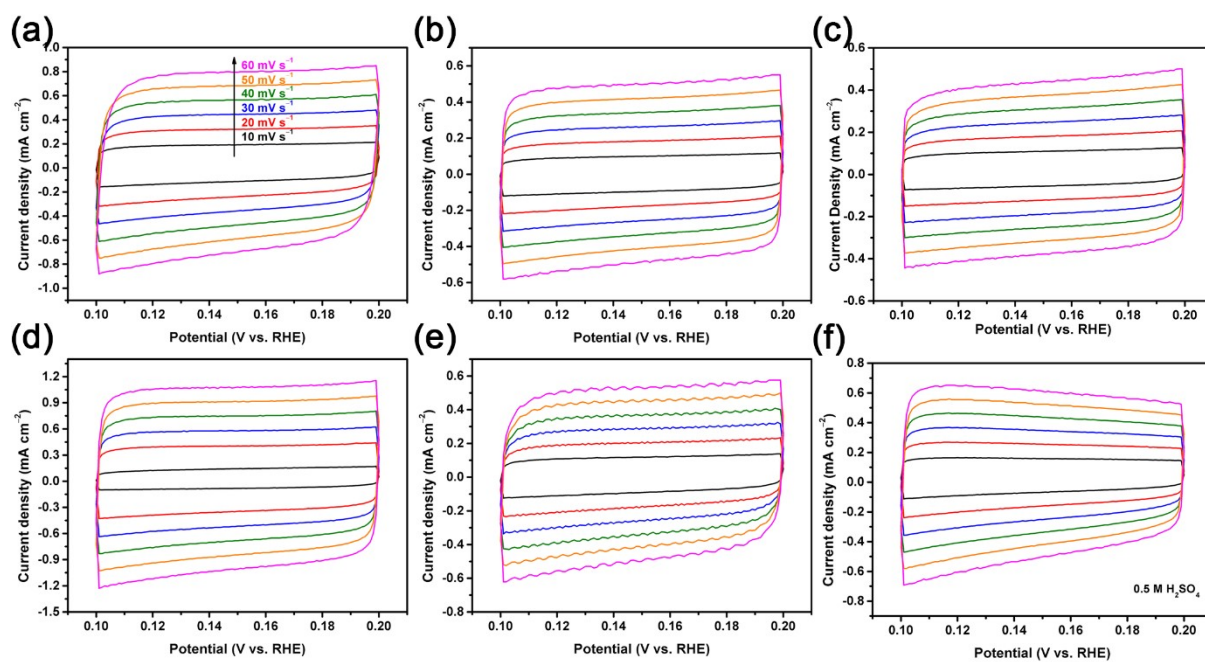

**Figure S5.** CV curves of the electrocatalysts: (a) Ni<sub>0</sub>-Mo<sub>2</sub>C/N; (b) Ni<sub>5</sub>-Mo<sub>2</sub>C/N; (c) Ni<sub>10</sub>-Mo<sub>2</sub>C/N; (d) Ni<sub>15</sub>-Mo<sub>2</sub>C/N; (e) Ni<sub>20</sub>-Mo<sub>2</sub>C/N, and (f) 20% Pt/C, which were measured at various scan rates of 10, 20, 30, 40, 50, and 60 mV s<sup>-1</sup> in 0.5 M H<sub>2</sub>SO<sub>4</sub>.

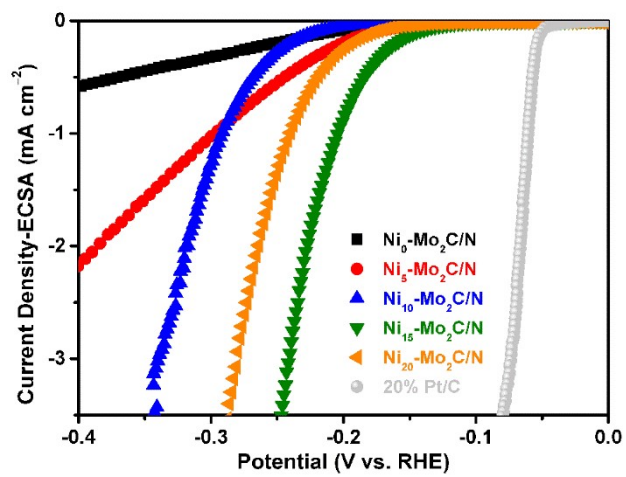

**Figure S6.** Normalized LSV curves by ECSA of the electrocatalysts in 0.5 M H<sub>2</sub>SO<sub>4</sub>.

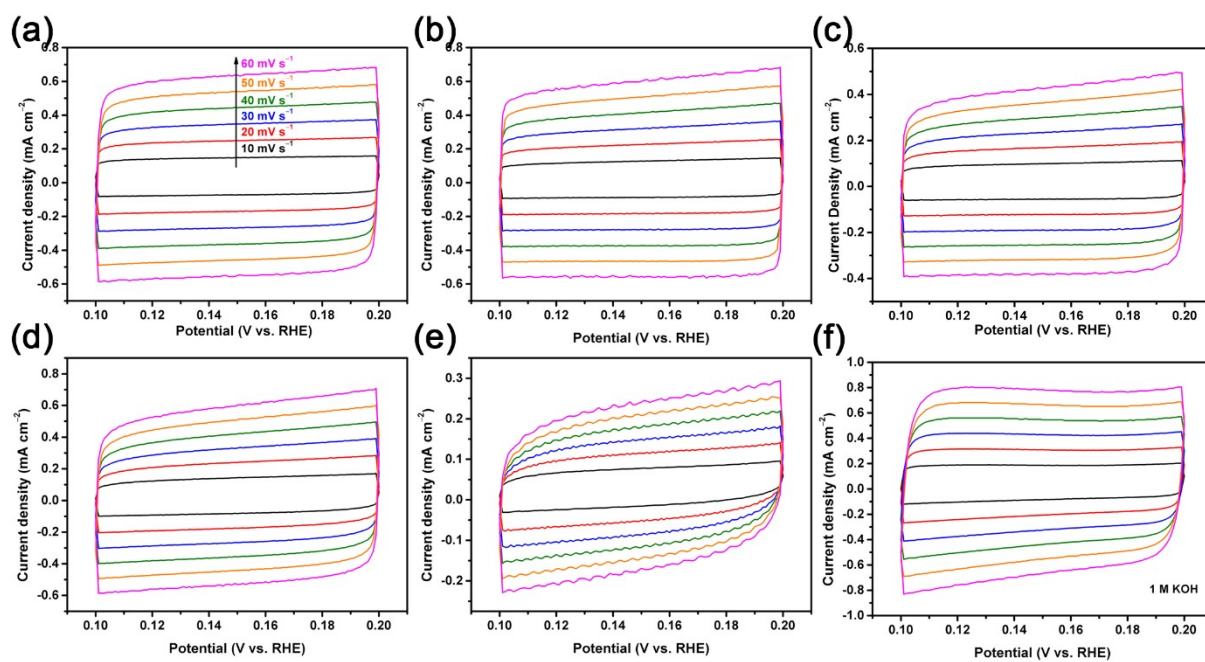

**Figure S7.** CV curves of the electrocatalysts: (a) Ni<sub>0</sub>-Mo<sub>2</sub>C/N; (b) Ni<sub>5</sub>-Mo<sub>2</sub>C/N; (c) Ni<sub>10</sub>-Mo<sub>2</sub>C/N; (d) Ni<sub>15</sub>-Mo<sub>2</sub>C/N; (e) Ni<sub>20</sub>-Mo<sub>2</sub>C/N, and (f) 20% Pt/C, which were measured at various scan rates of 10, 20, 30, 40, 50, and 60 mV s<sup>-1</sup> in 1 M KOH.



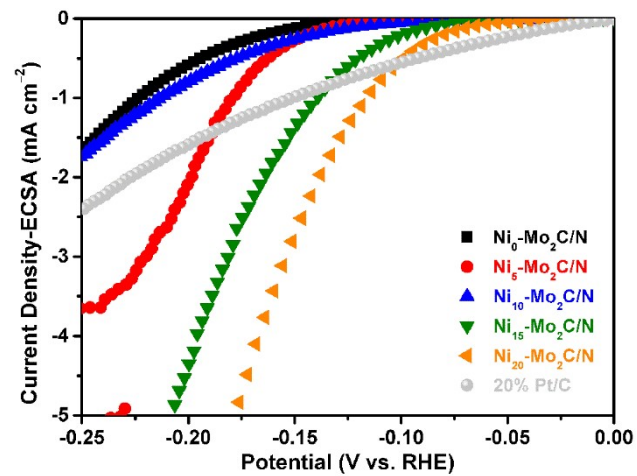

**Figure S8.** Normalized LSV curves by ECSA of the electrocatalysts in 1 M KOH.

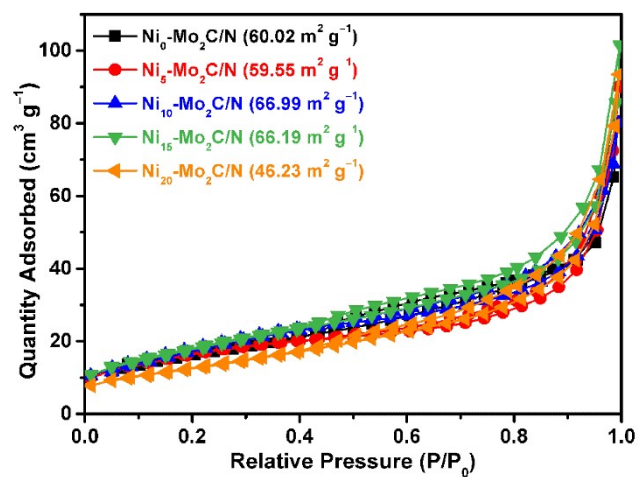

**Figure S9.** N<sub>2</sub> adsorption-desorption isotherms of the series Ni<sub>x</sub>-Mo<sub>2</sub>C/N electrocatalysts.

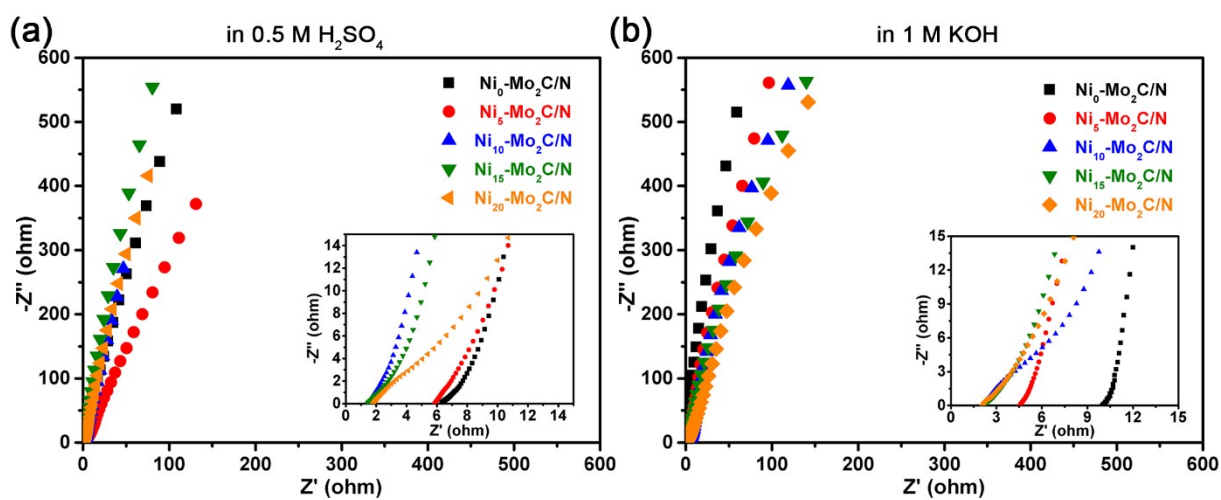

**Figure S10.** Nyquist plots of  $\text{Ni}_x\text{-Mo}_2\text{C/N}$  in (a)  $0.5 \text{ M H}_2\text{SO}_4$ ; (b)  $1 \text{ M KOH}$ .

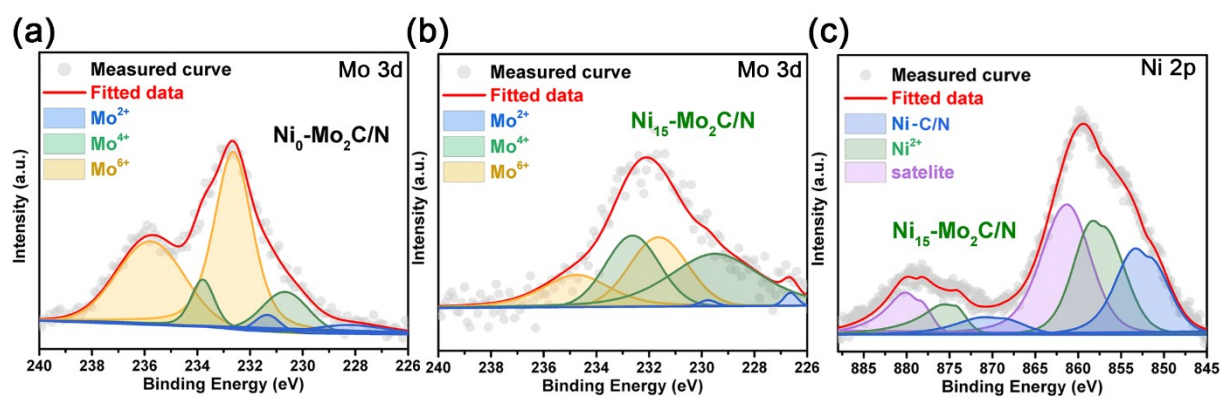

**Figure S11.** The high-resolution XPS spectra after stability test in 1M KOH: (a) Mo 3d spectrum of  $\text{Ni}_0\text{-Mo}_2\text{C/N}$ , (b) Mo 3d and (c) Ni 2p spectra of  $\text{Ni}_{15}\text{-Mo}_2\text{C/N}$ .

**Table S1** Comparison of element contents in Mo<sub>2</sub>C/N, 15% Ni-Mo<sub>2</sub>C/N from EDS results.

| Samples                    | Atomic Fraction (%) |      |       |      |
|----------------------------|---------------------|------|-------|------|
|                            | C                   | N    | Mo    | Ni   |
| Mo <sub>2</sub> C/N        | 56.89               | 6.67 | 36.44 | -    |
| 15% Ni-Mo <sub>2</sub> C/N | 60.53               | 2.90 | 35.86 | 0.71 |

**Table S2** The comparison of HER performance for different catalysts in literatures.

| Samples                                                        | Overpotential (mV)             |     | Tafel Slopes (mV/dec)          |        | References |
|----------------------------------------------------------------|--------------------------------|-----|--------------------------------|--------|------------|
|                                                                | 0.5M                           | 1M  | 0.5M                           | 1M     |            |
|                                                                | H <sub>2</sub> SO <sub>4</sub> | KOH | H <sub>2</sub> SO <sub>4</sub> | KOH    |            |
| Ni <sub>15</sub> -Mo <sub>2</sub> C/N                          | 155                            | 110 | 56.9                           | 46.5   | This work  |
| Mo <sub>2</sub> C,Mo <sub>2</sub> N/N,P-rGO                    | 195                            | 115 | 60                             | 57     | [2]        |
| Mo <sub>2</sub> C@C                                            | 170                            | 119 | 58                             | 51     | [3]        |
| Mo <sub>0.84</sub> Ni <sub>0.16</sub> -Mo <sub>2</sub> C/NCNFs | 229                            | 183 | 76                             | 71     | [4]        |
| Mo <sub>2</sub> C@BNC                                          | 184                            | 145 | 68.3                           | 57.4   | [5]        |
| Mo <sub>2</sub> C                                              | 235                            | 152 | 70.5                           | 40.2   | [6]        |
| Mo <sub>2</sub> C/NCF                                          | 144                            | 100 | 55                             | 65     | [7]        |
| Mo/Mo <sub>2</sub> C/N-CNFs                                    | 175                            | 162 | 64.6                           | 47.9   | [8]        |
| Fe-Mo <sub>2</sub> C@NCF                                       | 65                             | 129 | 110                            | 76     | [9]        |
| Ni <sub>0.5</sub> @MoC <sub>x</sub> /NC                        | 100                            | 150 | 53.2                           | 76.1   | [10]       |
| PMTC-7HA                                                       | 172                            | 219 | 56.2                           | 63.3   | [11]       |
| Ni-N-MoC <sub>x</sub>                                          | 163                            | 124 | 69.32                          | 106.74 | [12]       |
| m-Mo <sub>2</sub> C/G                                          | 135                            | 128 | 58                             | 56     | [13]       |
| Ni <sub>0.5</sub> @MoC <sub>x</sub> /NC                        | 100                            | 150 | 53.2                           | 74.6   | [14]       |
| Ni@Mo <sub>2</sub> C-HC800                                     | 192                            | 123 | 98                             | 83     | [15]       |
| Mo <sub>0.84</sub> Ni <sub>0.16</sub> -Mo <sub>2</sub> C/NCNFs | -                              | 183 | -                              | 71     | [16]       |
| Ni-GF/Mo <sub>2</sub> C                                        | 158                            | 189 | 159                            | 64     | [17]       |
| 30 wt.% Ni-MO <sub>2</sub> C-R,                                | -                              | 120 | -                              | 49     | [18]       |

**Table S3** The internal resistance tested before and after CV in acidic and alkaline conditions.

| Samples                               | 0.5 M H <sub>2</sub> SO <sub>4</sub> (Ω) |       | 1 M KOH (Ω) |       |
|---------------------------------------|------------------------------------------|-------|-------------|-------|
|                                       | Before                                   | After | Before      | After |
| Ni <sub>0</sub> -Mo <sub>2</sub> C/N  | 6.31                                     | 12.60 | 10.00       | 6.42  |
| Ni <sub>5</sub> -Mo <sub>2</sub> C/N  | 5.87                                     | 5.88  | 4.56        | 3.71  |
| Ni <sub>10</sub> -Mo <sub>2</sub> C/N | 1.49                                     | 1.52  | 2.14        | 2.11  |
| Ni <sub>15</sub> -Mo <sub>2</sub> C/N | 1.45                                     | 1.46  | 2.19        | 2.19  |
| Ni <sub>20</sub> -Mo <sub>2</sub> C/N | 1.81                                     | 1.79  | 2.09        | 2.03  |

## Reference

- [1]. C.-F. Du, X. Sun, H. Yu, Q. Liang, K. N. Dinh, Y. Zheng, Y. Luo, Z. Wang, Q. Yan, Synergy of Nb Doping and Surface Alloy Enhanced on Water–Alkali Electrocatalytic Hydrogen Generation Performance in Ti-Based MXene. *Adv. Sci.*, 2019. 6(11), 1900116.
- [2]. Y. I. Kurys, D. O. Mazur, V. G. Koshechko, V. D. Pokhodenko, Nanocomposite Based on N,P-Doped Reduced Graphene Oxide, Mo<sub>2</sub>C, and Mo<sub>2</sub>N as Efficient Electrocatalyst for Hydrogen Evolution in a Wide pH Range. *Electrocatalysis*, 2021. 12(5), 469-477.
- [3]. Y. Zhao, S. Wang, H. Liu, X. Guo, X. Zeng, W. Wu, J. Zhang, G. Wang, Porous Mo<sub>2</sub>C nanorods as an efficient catalyst for the hydrogen evolution reaction. *Journal of Physics and Chemistry of Solids*, 2019. 132, 230-235.
- [4]. L. Ying, S. Sun, W. Liu, H. Zhu, Z. Zhu, A. Liu, L. Yang, S. Lu, F. Duan, C. Yang, M. Du, Heterointerface engineering in bimetal alloy/metal carbide for superior hydrogen evolution reaction. *Renewable Energy*, 2020. 161, 1036-1045.
- [5]. S. Wu, M. Chen, W. Wang, J. Zhou, X. Tang, D. Zhou, C. Liu, Molybdenum carbide nanoparticles assembling in diverse heteroatoms doped carbon matrix as efficient hydrogen evolution electrocatalysts in acidic and alkaline medium. *Carbon*, 2021. 171, 385-394.
- [6]. Y. Wang, W. Hong, C. Jian, X. He, Q. Cai, W. Liu, The intrinsic hydrogen evolution performance of 2D molybdenum carbide. *Journal of Materials Chemistry A*, 2020. 8(45), 24204-24211.
- [7]. Y. Huang, Q. Gong, X. Song, K. Feng, K. Nie, F. Zhao, Y. Wang, M. Zeng, J. Zhong, Y. Li, Mo<sub>2</sub>C nanoparticles dispersed on hierarchical carbon microflowers for efficient electrocatalytic hydrogen evolution. *ACS Nano*, 2016. 10(12), 11337-11343.
- [8]. M. Li, H. Wang, Y. Zhu, D. Tian, C. Wang, X. Lu, Mo/Mo<sub>2</sub>C encapsulated in nitrogen-doped carbon nanofibers as efficiently integrated heterojunction electrocatalysts for hydrogen evolution reaction in wide pH range. *Applied Surface Science*, 2019. 496.
- [9]. J. Huang, J. Wang, R. Xie, Z. Tian, G. Chai, Y. Zhang, F. Lai, G. He, C. Liu, T. Liu, P. R. Shearing, D. J. L. Brett, A universal pH range and a highly efficient Mo<sub>2</sub>C-based electrocatalyst for the hydrogen evolution reaction. *Journal of Materials Chemistry A*, 2020. 8(38), 19879-19886.
- [10]. C. Liu, L. Sun, L. Luo, W. Wang, H. Dong, Z. Chen, Integration of Ni doping and a Mo<sub>2</sub>C/MoC heterojunction for hydrogen evolution in acidic and alkaline conditions. *ACS Applied Materials & Interfaces*, 2021. 13(19), 22646-22654.
- [11]. Y. Tang, C. Yang, M. Sheng, X. Yin, W. Que, J. Henzie, Y. Yamauchi, Phosphorus-doped molybdenum carbide/MXene hybrid architectures for upgraded hydrogen evolution reaction performance over a wide pH range. *Chemical Engineering Journal*, 2021. 423, 130183.
- [12]. J. Chen, J. Jia, Z. Wei, G. Li, J. Yu, L. Yang, T. Xiong, W. Zhou, Q. Tong, Ni and N co-doped MoC<sub>x</sub> as efficient electrocatalysts for hydrogen evolution reaction at all-pH values. *International Journal of Hydrogen Energy*, 2018. 43(31), 14301-14309.
- [13]. L. Huo, B. Liu, G. Zhang, J. Zhang, Universal strategy to fabricate a two-dimensional layered mesoporous Mo<sub>2</sub>C electrocatalyst hybridized on graphene sheets with high activity and durability for hydrogen generation. *ACS Applied Materials & Interfaces*, 2016. 8(28), 18107-18118.

- [14]. C. Liu, L. Sun, L. Luo, et al. Integration of Ni doping and a Mo<sub>2</sub>C/MoC heterojunction for hydrogen evolution in acidic and alkaline conditions[J]. ACS Appl Mater Interfaces, 2021, 13(19), 22646-22654.
- [15]. X. Xu, F. Nosheen, X. Wang. Ni-decorated molybdenum carbide hollow structure derived from carbon-coated metal–organic framework for electrocatalytic hydrogen evolution reaction. Chemistry of Materials, 2016, 28(17), 6313-6320.
- [16]. L. Ying, S. Sun, W. Liu, et al. Heterointerface engineering in bimetal alloy/metal carbide for superior hydrogen evolution reaction, Renewable Energy, 2020, 161, 1036-1045.
- [17]. C. Yang, R. Zhao, H. Xiang, et al. Ni-activated transition metal carbides for efficient hydrogen evolution in acidic and alkaline solutions, Advanced Energy Materials, 2020, 10(37), 2002260-2002270.
- [18]. P. Xiao, Y. Yan, X. Ge, et al. Investigation of molybdenum carbide nano-rod as an efficient and durable electrocatalyst for hydrogen evolution in acidic and alkaline media[J]. Applied Catalysis B: Environmental, 2014, 154-155, 232-237.
